# Supplementary material
Source: PubMed Central journal article supplement (PMC7042110)
Supplement: BPH-177-1041-s001.pdf [file BPH-177-1041-s001.pdf]

## Supplementary figures

Zhang et al, Figure S1

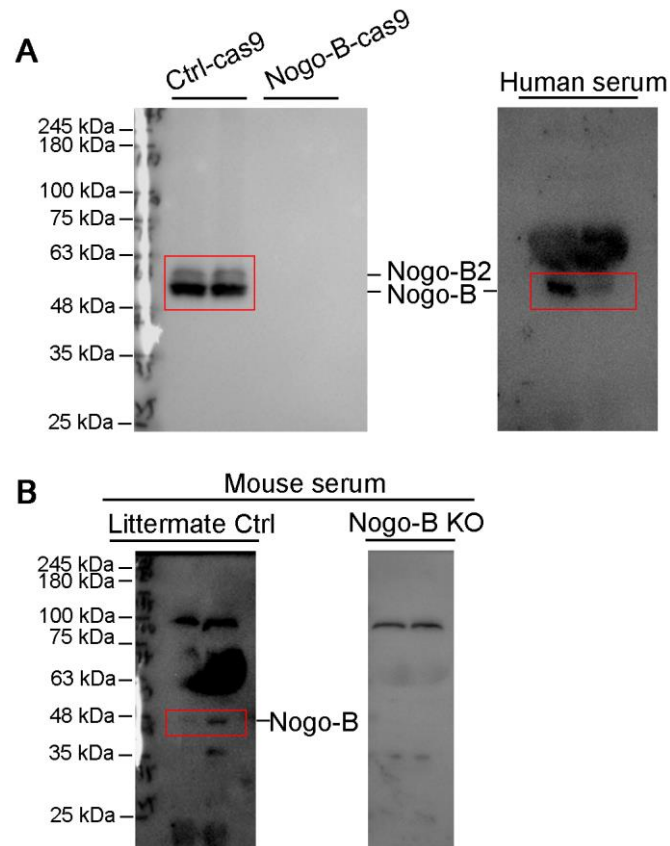

### Figure S1. Expression of Nogo family members in HepG2 cells, human and mouse serum

A: total cellular proteins were extracted from Ctrl-cas9 and Nogo-B-cas9 HepG2 cells. Expression of Nogo family members in HepG2 cells and human serum was determined by Western blot; B: serum samples were collected from littermate control and Nogo-B KO mice, followed by determination of Nogo family member protein expression by Western blot. Both Nogo-B2 and Nogo-B can be determined in HepG2 cells, while only Nogo-B was detectable in both human and mouse serum.

Zhang *et al*, Figure S2

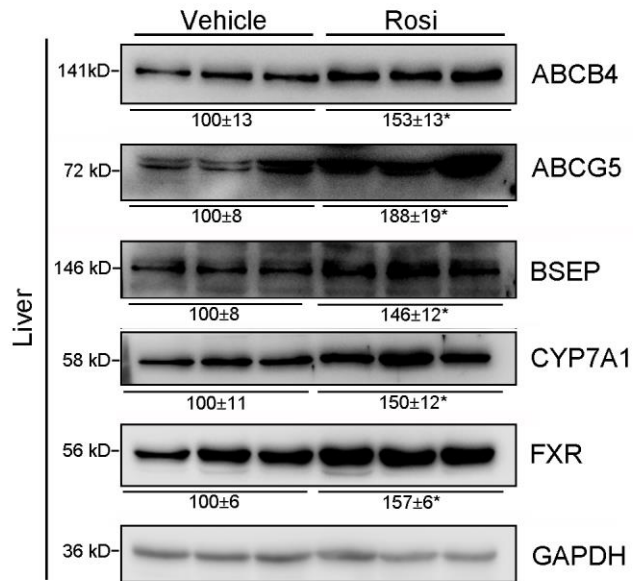

**Figure S2. Rosiglitazone induces expression of molecules for bile homeostasis in mouse liver.**

Total proteins were extracted from a piece of mouse liver after treatment as indicated in Figure 1A. Expression of ABCB4, ABCG5, BSEP, CYP7A1 and FXR protein was determined by Western blot with quantification of band density. \* $p < 0.05$  vs. Vehicle,  $n = 6$ .

Zhang *et al*, Figure S3

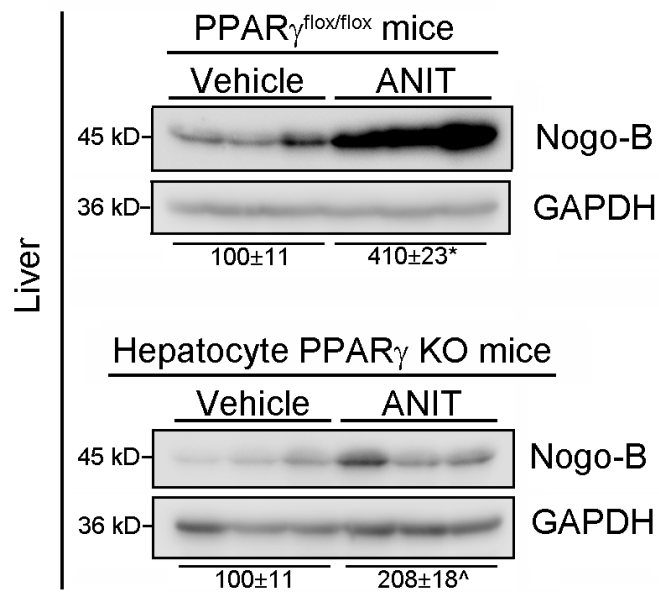

**Figure S3. ANIT induces Nogo-B expression in  $PPAR_{\gamma}^{fl/fl}$  and hepatocyte  $PPAR_{\gamma}$  KO mouse liver.**

Total proteins were extracted from a piece of liver of  $PPAR_{\gamma}^{fl/fl}$  and hepatocyte  $PPAR_{\gamma}$  KO mice after ANIT treatment as indicated in Figure 3A. Expression of Nogo-B in the liver was determined by Western blot with quantification of band density. \*, ^p<0.05 vs. Vehicle in corresponding type of mice, n=5 for Vehicle groups, n=7 for ANIT groups.

Zhang *et al*, Figure S4

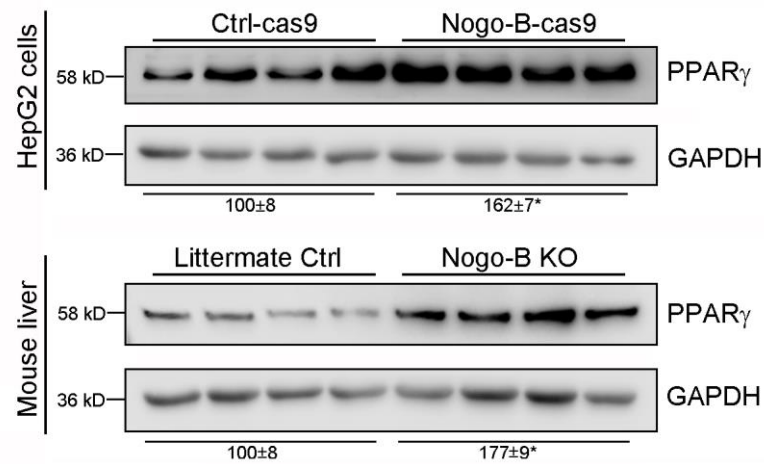

**Figure S4. Nogo-B deficiency induces PPAR $\gamma$  protein expression in HepG2 cells and mouse liver.**

Total proteins were extracted from Ctrl-cas9 and Nogo-B-cas9 HepG2 cells, or a piece of liver of littermate control and Nogo-B KO mice, followed by determination of PPAR $\gamma$  protein expression by Western blot with quantification of band density. \* $p < 0.05$  vs. Ctrl-cas9 cells or littermate control mice,  $n = 6$ .

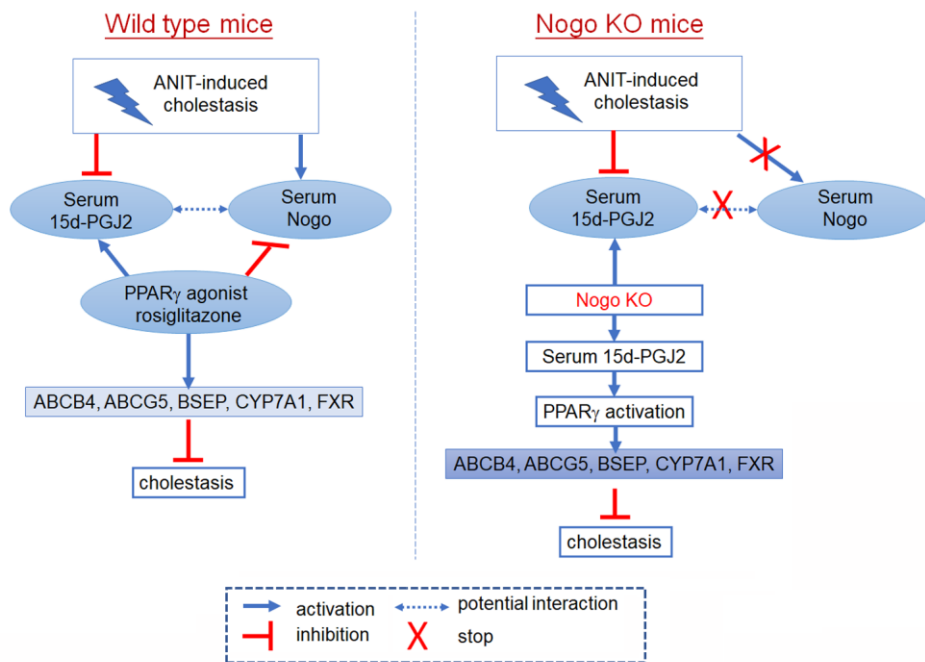

**Figure S5. The model depicts anti-intrahepatic cholestasis properties of rosiglitazone and Nogo-B deficiency.**

In wild type mice, ANIT induces intrahepatic cholestasis by inhibiting expression of molecules for bile homeostasis, which is associated with reduction of 15d-PGJ<sub>2</sub> and increase of Nogo in circulation. Treatment of cholestatic mice with rosiglitazone activates PPAR $\gamma$  to correct ANIT-inhibited hepatic expression of molecules for bile homeostasis and circulating 15d-PGJ<sub>2</sub> and Nogo, thereby reducing intrahepatic cholestasis. In Nogo KO mice, lack of Nogo-B expression in the liver enhances 15d-PGJ<sub>2</sub> production to activate PPAR $\gamma$ , therefore, the basal expression of molecules for bile homeostasis is activated which results in that Nogo KO mice are resistant to intrahepatic cholestasis naturally.
